# Supplementary material for: Elevated lymphotoxin-α (TNFβ) is associated with intervertebral disc degeneration
Source: Springer Nature journal article supplement (doi:10.1186/s12891-020-03934-7), 2021-01-13

Ladder  
Control 1  
Control 2  
Control 3  
Control 4  
Control 5  
Degeneration 1  
Degeneration 2  
Degeneration 3  
Degeneration 4  
Degeneration 5

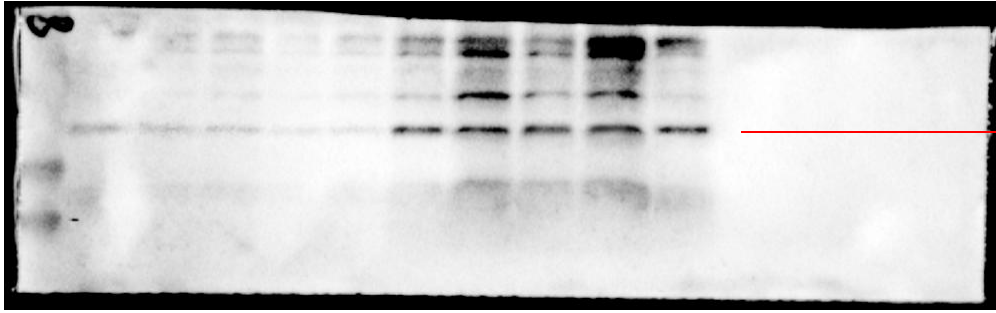

LTα 22 kDa

Exposure time: 10s

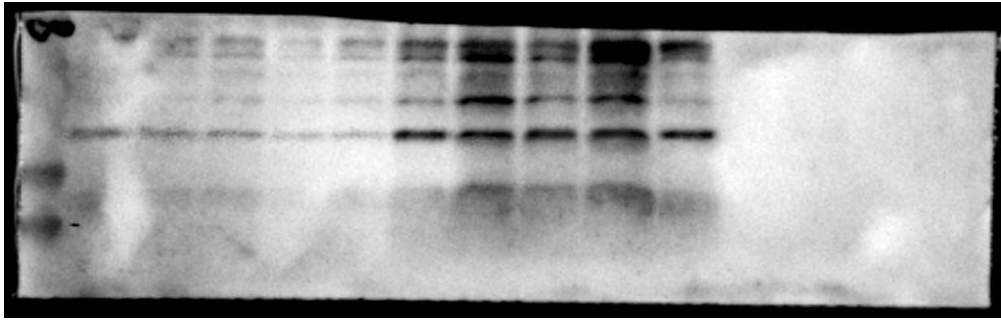

Exposure time: 20s

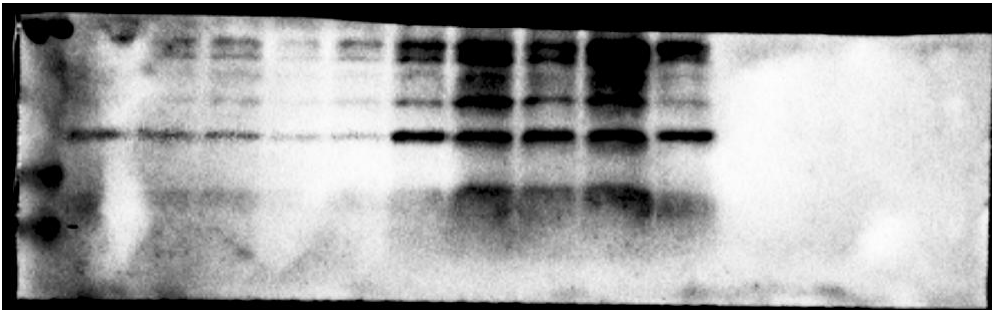

Exposure time: 30s

The bands of Control 5 and Degeneration 1 were selected as a typical image, as shown in Figure 1.

Ladder  
Control 1  
Control 2  
Control 3  
Control 4  
Control 5  
Degeneration 1  
Degeneration 2  
Degeneration 3  
Degeneration 4  
Degeneration 5

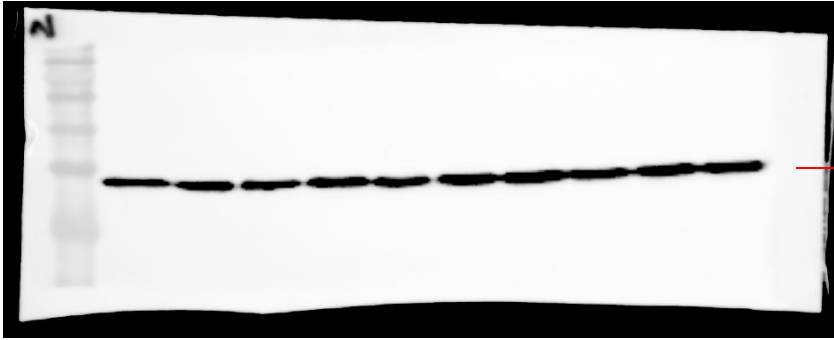

GAPDH 36 kDa

Exposure time: 10s

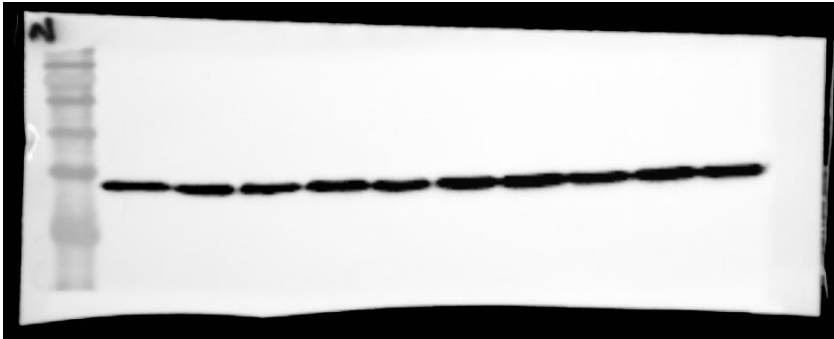

Exposure time: 20s

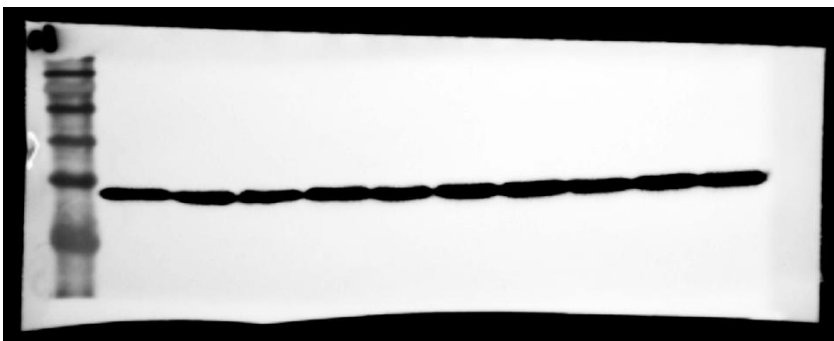

Exposure time: 30s

The bands of Control 5 and Degeneration 1 were selected as a typical image, as shown in Figure 1.

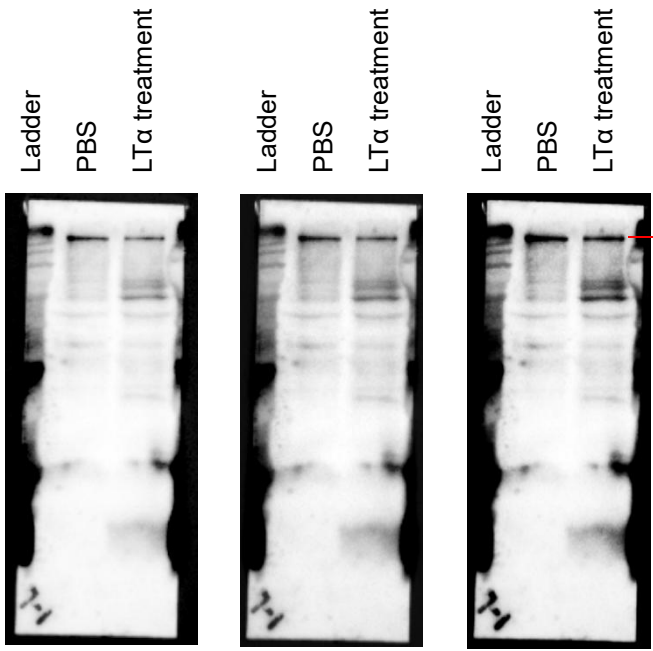

Exposure time      10s                      20s                      30s

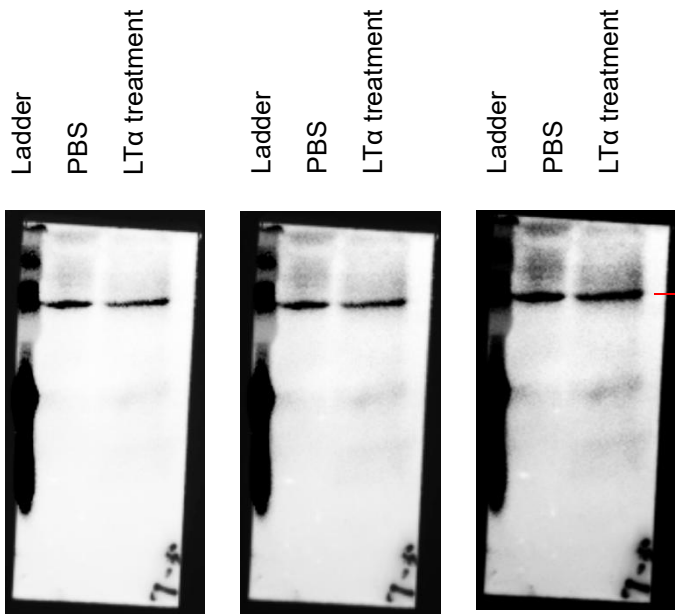

Exposure time      10s                      20s                      30s

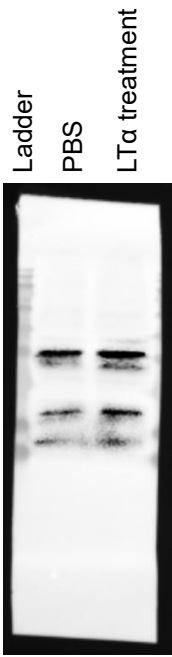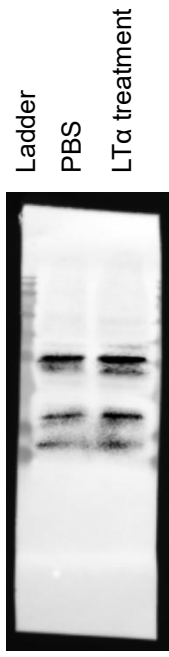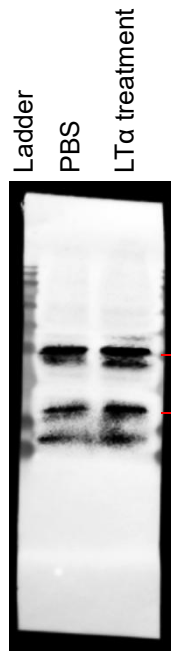

Pro-caspase-3 35 kDa

Caspase-3 18 kDa

Exposure time

10s

20s

30s

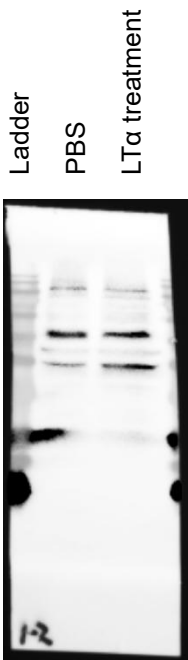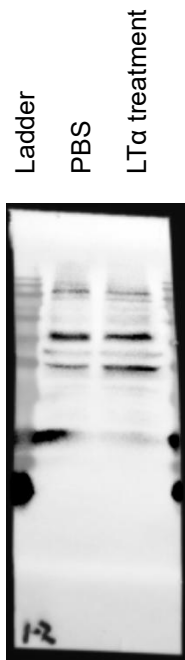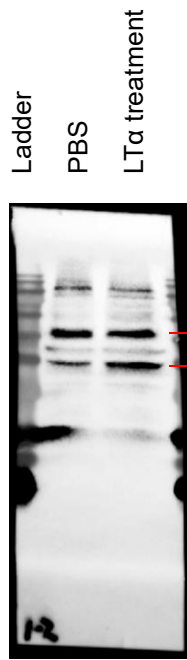

Pro-caspase-1 46 kDa

Caspase-1 36 kDa

Exposure time

10s

20s

30s

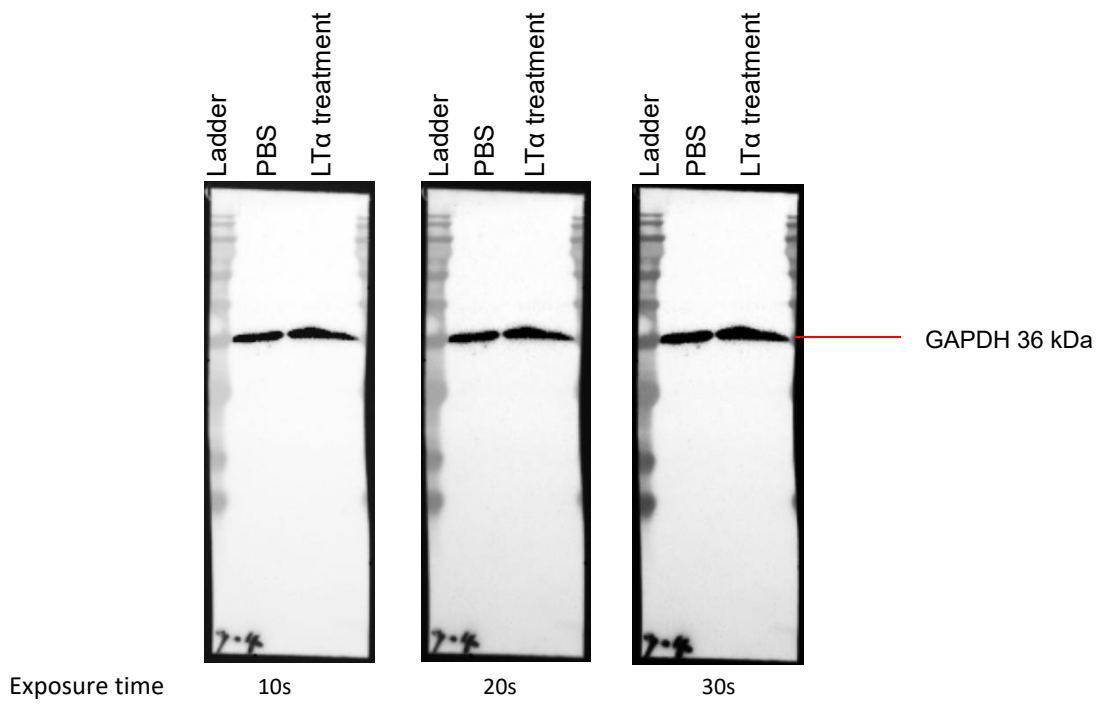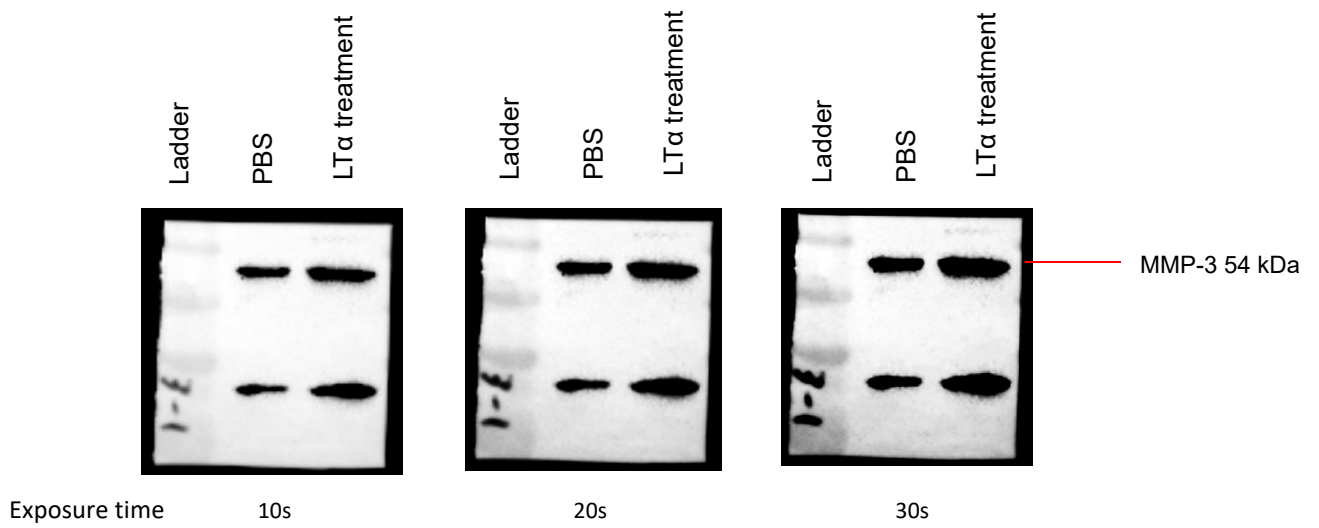

Supplement: MOESM1 [file 18765638]
